# Supplementary material for: Assessing Nutritional Diversity of Cropping Systems in African Villages
Source: PLoS One. 2011 Jun 16;6(6):e21235. doi: 10.1371/journal.pone.0021235 (PMC3116903; doi:10.1371/journal.pone.0021235)
Supplement: Table S1 — List of edible, characterized plant species that were identified at the study sites. (XLS) [file pone.0021235.s003.xls]

## Sheet: Species
	Code	Common name	Genus	Species	Family	Sauri	Ruhiira	Mwandama	Regularly sold by HH
1	ABEESC	Okra (local variety)	Abelmoschus	esculentus	Malvaceae	X	X	X	X
2	ALLCEP	Onion	Allium	cepa	Alliaceae	X	X	X	X
3	AMASPPL	Amaranth	Amaranthus	species	Amaranthaceae	X	X	X	X
4	ANACOM	Pineapple	Ananas	comosus	Bromeliaceae		X		X
5	ANNRET	Custard apple	Annona	reticulate	Annonaceae			X
6	ARAHYP	Groundnut (peanut)	Arachis	hypogaea	Fabaceae		X	X	X
7	ARTSPP	Jackfruit	Artocarpus		Moraceae	X	X	X	X
8	BIDPIL	Black jack	Bidens	pilosa	Asteraceae	X	X	X	only consumed in Mwandama
9	BRAACE	Kale (sukuma wiki)	Brassica	oleracea	Brassicaceae	X	X		X
10	BRACAP	Cabbage	Brassica	oleracea	Brassicaceae	X	X	X	X
11	BRARAP	Turnip	Brassica	rapa	Brassicaceae			X	X
12	CAJCAJ	Pigeon pea	Cajanus	cajan	Fabaceae	X	X	X	X
13	CAPANN	Pepper (green)	Capsicum	annuum	Solanaceae	X	X	X	X
14	CAPFRU	Chili pepper	Capsicum	frutescens	Solanaceae	X	X	X	X
15	CARPAP	Papaya	Carica	papaya	Caricaceae		X	X
16	CITLANF	Watermelon	Citrullus	lanatus	Cucurbitaceae	X	X		X
17	CITLIM	Lemon	Citrus	limon	Rutaceae	X	X	X
18	CITRET	Tangerine	Citrus	reticulate	Rutaceae		X	X	X
19	CITSIN	Orange	Citrus	sinensis	Rutaceae	X	X	X	X
20	CLEGYN	Spiderweed	Cleome	gynandra	Capparidaceae	X	X		X
21	COFSPP	Coffee	Coffea		Rubiaceae	X	X		X
22	COLESC	Cocoyam	Colocasia	esculenta	Araceae	X	X	X
23	CORSPP	Apoth	Corchorus	olitorius	Tiliaceae	X			X
24	CROBRE	Mitoo	Crotalaria		Papilionaceae	X			X
25	CUCSPPF	Pumpkin	Cucurbita		Cucurbitaceae	X	X
26	CYPBET	Tree tomato	Solanum	betaceum	Solanaceae		X
27	DAUCAR	Carrots	Daucus	carota	Apiaceae	X	X		X
28	DIOSPP	Yam	Dioscorea		Dioscoreaceae		X
29	ELECAR	Cardamom	Elettaria	cardamomum	Zingiberaceae		X		X
30	ELECOR	Finger millet	Eleusine	coracana	Poaceae			X
31	ERIJAP	Musabibu	Eriobotrya	japonica	Rosaceae	X
32	FICCAP	Fig tree	Ficus	capensis	Moraceae			X
33	GLYMAX	Soybean	Glycine	max	Fabaceae		X		X
34	HELANN	Sunflower	Helianthus	annuus	Asteraceae		X		X
35	IPOBATL	Sweet potatoes	Ipomoea	batatas	Convolvulaceae	X	X	X	X
36	LABPUR	Lablab	Lablab	purpureus	Fabaceae			X	X
37	LAGSIC	Calabash gourd	Lagenaria	siceraria			X		X
38	LAUCOR	Achak	Launaea	cornuta	Compositae	X			X
39	LUFSPP	Loofah	Luffa		Cucurbitaceae		X
40	MACSPP	Macadamia	Macadamia		Proteaceae			X	X
41	MALDOM	Apple	Malus	domestica	Rosaceae		X	X	X
42	MALPAR	Ekituluguma	Malva	parviflora	Malvaceae		X
43	MANESCL	Cassava	Manihot	esculenta	Euphorbiaceae	X	X	X
44	MANIND	Mango	Mangifera	indica	Anacardiaceae		X	X	X
45	MOROLIL	Moringa	Moringa	oleifera	Moringaceae	X
46	MORSPP	Mulberry (Onunga)	Morus	alba	Moraceae	X	X	X
47	MUSSPP	Banana	Musa	acuminata	Musaceae	X	X	X	X
48	ORYGLA	Rice	Oryza	glaberrima	Poaceae		X		X
49	PASEDU	Passionfruit	Passiflora	edulis	Passifloraceae	X	X	X	X
50	PENGLA	Millet	Pennisetum	glaucum	Poaceae		X
51	PERAME	Avocado	Persea	americana	Lauraceae	X	X	X	X
52	PHAVUL	Bean	Phaseolus	vulgaris	Fabaceae	X	X	X	X
53	PHYSPP	Cape gooseberries	Physalis	peruviana	Solanaceae	X	X
54	PISSAT	Peas	Pisum	sativum	Fabaceae		X	X	X
55	PRUPER	Peach	Prunus	persica	Rosaceae			X	X
56	PSIGUA	Guava	Psidium	guajava	Myrtaceae		X	X
57	PUNGRA	Pomegranate	Punica	granatum	Punicaceae			X	X
58	ROSOFF	Rosemary	Rosmarinus	officinalis	Lamiaceae	X
59	SACSPP	Sugarcane	Saccharum		Poaceae	X	X	X	X
60	SECEDU	Chayote/omunete	Sechium	edule	Cucurbitaceae		X
61	SESCAL	Onyulo	Sesamum	calycinum	Pedaliaceae	X
62	SOLELO	Eggplant	Solanum	melongena	Solanaceae	X
63	SOLGIL	Eggplant (black)	Solanum	macrocarpon	Solanaceae		X	X
64	SOLLYC	Tomato	Solanum	lycopersicum	Solanaceae	X	X	X	X
65	SOLNIGL	Black nightshade	Solanum	nigrum	Solanaceae	X	X		X
66	SOLTUB	Irish potato	Solanum	tuberosum	Solanaceae		X	X	X
67	SORBIC	Sorghum	Sorghum	bicolor	Graminaceae	X	X	X	X
68	SYZCUM	Java plum (mzambarau, jamna)	Syzigium	cumini	Myrtaceae	X
69	UIDKS1	Mushrooms				X	X		X
70	VANMAD	Spanish tamarind	Vangueria	madagascariensis	Rubiacaee		X
71	VANPLA	Vanilla	Vanilla	planifolia	Orchidaceae		X		X
72	VIGRAD	Green grams/moong beans	Vigna	radiata	Fabaceae	X			X
73	VIGUNGL	Cowpea	Vigna	unguiculata	Fabaceae	X	X	X	X
74	VITDON	Black plum	Vitex	doniana	Verbenaceae			X
75	XANSAG	Cocoyam	Xanthosoma	sagittifolium	Araceae	X	X	X
76	ZEAMAY	Maize	Zea	mays	Poaceae	X	X	X	X
77	ZINOFF	Ginger	Zingiber	officinale	Zingiberaceae		X		X
